# Supplementary material for: Spectroscopic and Theoretical Studies of Some 3-(4′-Substituted phenylsulfanyl)-1-methyl-2-piperidones
Source: Molecules. 2013 Jun 27;18(7):7492–509. doi: 10.3390/molecules18077492 (PMC6269881; doi:10.3390/molecules18077492)
Supplement: Supplementary file 1 [file molecules-18-07492-s001.pdf]

## Supplementary Materials

**Table S1.** Relative energies (E, kJ mol<sup>-1</sup>), dipole moments ( $\mu$ , D), carbonyl frequencies ( $\nu$ , cm<sup>-1</sup>), and selected torsion angles (deg) calculated for the minimum energy conformations of 3-phenylthio-1-methyl-2-piperidone **4** at the MP2/6-31+G(d,p) level.

| Method          | Conf. <sup>a</sup> | E <sup>b</sup> | P <sup>c</sup> | $\mu$ | $\nu_{\text{CO}}$ | Torsion angles/ <sup>o</sup> <sup>d</sup> |         |          |          |          |           |          |           |
|-----------------|--------------------|----------------|----------------|-------|-------------------|-------------------------------------------|---------|----------|----------|----------|-----------|----------|-----------|
|                 |                    |                |                |       |                   | $\alpha$                                  | $\beta$ | $\gamma$ | $\delta$ | $\theta$ | $\theta'$ | $\omega$ | $\omega'$ |
| MP2/6-31+G(d,p) | <i>ax</i>          | 0              | 77.7           | 3.68  | 1717.5            | 85.2                                      | -104.3  | 55.5     | 4.16     | 161.8    | -151.1    | 30.3     | -52.6     |
|                 | <i>eq</i>          | 3.09           | 22.3           | 5.89  | 1715.7            | 27.1                                      | 178.9   | 73.0     | -6.20    | -163.1   | 152.8     | -31.1    | 52.2      |

<sup>a</sup> Conformer designations *ax* and *eq* refers to the *axial* and *equatorial* conformers, respectively; <sup>b</sup> Relative energy; <sup>c</sup> Molar fraction in percentage; <sup>d</sup> See Scheme 1.

**Table S2.** Single point PCM solvent effect on the minimum energy gas phase for the conformations of **4** at the MP2/6-31+G(d,p) level; relative energies (E, kJ mol<sup>-1</sup>) and dipole moments ( $\mu$ , D).

| Conf. <sup>a</sup> | C <sub>7</sub> H <sub>14</sub> |                |       | CCl <sub>4</sub> |      |       | CHCl <sub>3</sub> |      |       | CH <sub>2</sub> Cl <sub>2</sub> |      |       | CH <sub>3</sub> CN |      |       |
|--------------------|--------------------------------|----------------|-------|------------------|------|-------|-------------------|------|-------|---------------------------------|------|-------|--------------------|------|-------|
|                    | E <sup>b</sup>                 | P <sup>c</sup> | $\mu$ | E                | P    | $\mu$ | E                 | P    | $\mu$ | E                               | P    | $\mu$ | E                  | P    | $\mu$ |
| <i>ax</i>          | 0                              | 58.6           | 4.10  | 0                | 53.7 | 4.19  | 1.63              | 34.1 | 4.55  | 2.76                            | 24.7 | 4.75  | 3.89               | 17.2 | 4.95  |
| <i>eq</i>          | 0.86                           | 41.4           | 6.59  | 0.37             | 46.3 | 6.74  | 0                 | 65.9 | 7.35  | 0                               | 75.3 | 7.69  | 0                  | 82.8 | 8.04  |

<sup>a</sup> Conformer designations *ax* and *eq* refers to the *axial* and *equatorial* conformers, respectively; <sup>b</sup> Relative energy; <sup>c</sup> Molar fraction in percentage.

**Table S3.** Mülliken charge (*e*) at selected atoms obtained at the B3LYP/6-31+G(d,p) level for 3-phenylsulfanyl-1-methyl-2-piperidone **4**.

| Conf.     | O(1)   | C(2)   | S(4)  | N(6)   | H(26) | H(30) | H(5)  | H(11) | H(16) | H(17) |
|-----------|--------|--------|-------|--------|-------|-------|-------|-------|-------|-------|
| <i>ax</i> | -0.467 | 0.012  | 0.045 | -0.057 | 0.181 | 0.131 | 0.213 | 0.195 | 0.148 | 0.167 |
| <i>eq</i> | -0.458 | -0.037 | 0.059 | -0.182 | 0.131 | 0.135 | 0.196 | 0.195 | 0.149 | 0.154 |

**Table S4.** NBO occupancy of selected orbitals calculated at the B3LYP/6-31+G(d,p) level for the *ax* and *eq* conformers of 3-phenylthio-1-methyl-2-piperidone **3**.

| Orbitals                                                 | <i>ax</i>       |                 | <i>eq</i> |       |
|----------------------------------------------------------|-----------------|-----------------|-----------|-------|
|                                                          | DO <sup>a</sup> | AO <sup>b</sup> | DO        | AO    |
| LP <sub>N6</sub> → $\pi^*$ <sub>C2=O1</sub>              | 1.666           | 0.320           | 1.674     | 0.284 |
| LP <sub>O1</sub> → $\sigma^*$ <sub>C2-N6</sub>           | 1.866           | 0.079           | 1.861     | 0.080 |
| LP <sub>O1</sub> → $\sigma^*$ <sub>C2-C3</sub>           | 1.866           | 0.070           | 1.861     | 0.068 |
| LP <sub>O1</sub> → $\sigma^*$ <sub>C21-H26</sub>         | 1.866           | 0.134           | 1.861     | 0.014 |
| LP <sub>O1</sub> → $\sigma^*$ <sub>C10-H11</sub>         | 1.866           | 0.009           | 1.861     | 0.011 |
| LP <sub>S4</sub> → $\pi^*$ <sub>C2=O1</sub>              | 1.892           | 0.320           | 1.925     | 0.284 |
| LP <sub>S4</sub> → $\pi^*$ <sub>C20-C21</sub>            | 1.892           | 0.388           | 1.925     | 0.368 |
| $\sigma$ <sub>C3-S4</sub> → $\pi^*$ <sub>C2=O1</sub>     | 1.959           | 0.320           | 1.964     | 0.284 |
| $\sigma$ <sub>C3-S4</sub> → $\sigma^*$ <sub>C2-N6</sub>  | 1.959           | 0.079           | 1.964     | 0.080 |
| $\sigma$ <sub>C3-S4</sub> → $\sigma^*$ <sub>C9-H18</sub> | 1.959           | 0.016           | 1.964     | 0.016 |
| $\pi$ <sub>C2=O1</sub> → $\sigma^*$ <sub>C3-S4</sub>     | 1.989           | 0.037           | 1.989     | 0.034 |
| $\pi^*$ <sub>C2=O1</sub> → $\sigma^*$ <sub>C3-S4</sub>   | 0.320           | 0.037           | 0.284     | 0.034 |

<sup>a,b</sup> Donor and acceptor orbitals, respectively.

ax.gif

%mem=8000MB

%nprocshared=7

# freq rb3lyp/6-31+g(d,p) scrf=check guess=tcheck genchk geom=allcheck

Title Card Required

0 1

|   |             |             |             |
|---|-------------|-------------|-------------|
| C | 1.56098700  | 0.85633300  | 0.24008800  |
| C | 3.60080300  | -0.59046300 | -0.05870300 |
| C | 1.63206400  | -1.53087700 | 1.16724900  |
| C | 2.72495400  | -1.82464300 | 0.13978100  |
| C | 0.75740000  | -0.37324400 | 0.67499300  |
| N | 2.83652200  | 0.65386700  | -0.21726500 |
| H | 4.23122400  | -0.70952900 | -0.94786400 |
| H | 1.01260000  | -2.41162500 | 1.36015000  |
| H | 3.35978700  | -2.65676400 | 0.46287400  |
| H | 0.07465600  | -0.03551400 | 1.45626300  |
| H | 4.28189100  | -0.47554100 | 0.80057600  |
| H | 2.09274800  | -1.23942300 | 2.12252500  |
| H | 2.26832300  | -2.12112500 | -0.81228800 |
| O | 1.04343500  | 1.97548000  | 0.27788000  |
| S | -0.32957100 | -0.93395300 | -0.73712100 |
| C | 3.62304000  | 1.81149800  | -0.63061600 |
| H | 4.13679900  | 1.58870200  | -1.57204700 |
| H | 4.37677800  | 2.06415700  | 0.12775900  |
| H | 2.95697900  | 2.66206400  | -0.76435200 |
| C | -1.94516800 | -0.29200300 | -0.29125800 |
| C | -4.53480000 | 0.63169500  | 0.25421500  |
| C | -3.04530900 | -1.15043700 | -0.43509500 |
| C | -2.14258700 | 1.03488500  | 0.12047000  |
| C | -3.43530800 | 1.48214200  | 0.40537300  |

|   |             |             |             |
|---|-------------|-------------|-------------|
| C | -4.33594400 | -0.68352900 | -0.17349400 |
| H | -2.88869400 | -2.18037100 | -0.74155600 |
| H | -1.29298100 | 1.70518100  | 0.21154500  |
| H | -3.58154200 | 2.50811000  | 0.73172200  |
| H | -5.18208700 | -1.35506500 | -0.28933500 |
| H | -5.53727900 | 0.99094700  | 0.46776400  |

eq.gif

%mem=15500MB

%nprocshared=8

# freq rb3lyp/6-31+g(d,p) scrf=check guess=tcheck genchk geom=allcheck

Title Card Required

0 1

|   |             |             |             |
|---|-------------|-------------|-------------|
| C | -2.13586900 | -0.72985600 | 0.16724000  |
| C | -3.08388900 | 1.59452200  | -0.09485700 |
| C | -0.60957500 | 1.28662100  | -0.29250800 |
| C | -1.72165300 | 2.15297600  | 0.30055600  |
| C | -0.72501900 | -0.12752600 | 0.27964600  |
| N | -3.19240100 | 0.14726500  | 0.11790400  |
| H | -3.28495200 | 1.81569500  | -1.15583100 |
| H | -0.70114600 | 1.24919200  | -1.38577200 |
| H | -1.63092900 | 2.17992000  | 1.39423200  |
| H | -0.49769700 | -0.10026100 | 1.35352300  |
| H | -3.87951500 | 2.07739600  | 0.48550500  |
| H | 0.37634700  | 1.70258000  | -0.06662500 |
| H | -1.64555100 | 3.18705900  | -0.05359200 |
| O | -2.29786500 | -1.94857800 | 0.18249200  |
| S | 0.44377000  | -1.35141500 | -0.48961600 |
| C | -4.54168000 | -0.39595000 | -0.00451000 |
| H | -4.93140000 | -0.24552800 | -1.02055500 |
| H | -5.20856400 | 0.10936500  | 0.70282600  |
| H | -4.51473400 | -1.46275300 | 0.21018800  |
| C | 2.01294800  | -0.53285300 | -0.16994000 |
| C | 4.52594500  | 0.63480000  | 0.29342200  |
| C | 2.74878100  | 0.01246700  | -1.23191700 |
| C | 2.55348000  | -0.50050800 | 1.12551400  |

|   |            |             |             |
|---|------------|-------------|-------------|
| C | 3.79701600 | 0.09137500  | 1.35648100  |
| C | 4.00255400 | 0.58722700  | -1.00080300 |
| H | 2.33666700 | -0.01824500 | -2.23576500 |
| H | 2.00465500 | -0.95252400 | 1.94664100  |
| H | 4.20420800 | 0.11266000  | 2.36350800  |
| H | 4.56563600 | 1.00142300  | -1.83247600 |
| H | 5.49814200 | 1.08465100  | 0.47284300  |
